# Increased Growth and Germination Success in Plants following Hydrogen Sulfide Administration

Frederick D. Dooley\*, Suven P. Nair, Peter D. Ward

Department of Biology, University of Washington, Seattle, Washington, United States of America

## Abstract

This study presents a novel way of enhancing plant growth through the use of a non-petroleum based product. We report here that exposing either roots or seeds of multicellular plants to extremely low concentrations of dissolved hydrogen sulfide at any stage of life causes statistically significant increases in biomass including higher fruit yield. Individual cells in treated plants were smaller (~13%) than those of controls. Germination success and seedling size increased in, bean, corn, wheat, and pea seeds while time to germination decreases. These findings indicated an important role of H<sub>2</sub>S as a signaling molecule that can increase the growth rate of all species yet tested. The increased crop yields reported here has the potential to effect the world's agricultural output.

**Citation:** Dooley FD, Nair SP, Ward PD (2013) Increased Growth and Germination Success in Plants following Hydrogen Sulfide Administration. PLoS ONE 8(4): e62048. doi:10.1371/journal.pone.0062048

**Editor:** Suzannah Rutherford, Fred Hutchinson Cancer Research Center, United States of America

**Received:** October 19, 2012; **Accepted:** March 18, 2013; **Published:** April 17, 2013

**Copyright:** © 2013 Dooley et al. This is an open-access article distributed under the terms of the Creative Commons Attribution License, which permits unrestricted use, distribution, and reproduction in any medium, provided the original author and source are credited.

**Funding:** The authors declare no competing financial interest; funding was provided by the Directors Discretionary Fund from the NASA Astrobiology Institute and the funders had no role in study design, data collection and analysis, decision to publish, or preparation of the manuscript.

**Competing Interests:** The authors have declared that no competing interests exist.

\* E-mail: fdd@u.washington.edu

## Introduction

The biological effects of hydrogen sulfide (H<sub>2</sub>S) have received increasing attention in recent years, not only as a putative kill mechanism during past mass extinctions [1–4], but also as an important signaling molecule in both aerobic and anaerobic organisms [5–13]. Hydrogen sulfide has recently been added to nitric oxide (NO) and carbon monoxide (CO) as a newly categorized group of biologically active gases termed gasotransmitters and gasomediators [7,14]. The origin of these dual activities remains unknown, but it may be that these varied signaling and biological mediating capabilities are remnants of biological responses by life either evolving or inhabiting highly sulfidic and anoxic environments of earlier times in Earth history. Today, H<sub>2</sub>S causes a wide variety of vital effects across the “Tree of Life”, from metabolic inhibition [15], to energy source [16–20], to coordination of developmental growth programs in yeast [21–22] and perhaps higher organisms as well. These findings led Lloyd [16] to propose that H<sub>2</sub>S is as an important signaling mediator in most or all prokaryotic clades. Yet, in spite of these findings, only recently have there been analogous investigations into the potential signaling role of H<sub>2</sub>S in eukaryotes. To date, only studies on its effect on the functioning of the electron transport chain in animals, and separately on its inhibition of physiological processes enabling endothermy in birds and mammals have been conducted [23–24].

Studies into the effects of sulfur and sulfide compounds on plants are still few in number [13,25–26], and of these, most have concerned the lethal effects of gaseous hydrogen sulfide on plants [13,26]. From these it is now known that H<sub>2</sub>S causes inhibition of photosynthesis at high concentrations [25,27–29] and that it can decrease the time to germination [30], but also increases the resilience to drought and heavy metal toxicity [30–33]. Recent

emerging evidence has also suggested a possible signaling role for stomatal apertures [11–12,26], and in promoting chloroplast biogenesis [25].

To ascertain the potential role of H<sub>2</sub>S in that of higher plants, we conducted a series of experiments designed to evaluate potential effects of H<sub>2</sub>S on various plant species when administered at sub-lethal levels. We show here that micromolar concentrations of hydrogen sulfide dissolved in water and taken up by either seeds or roots have significant effects on important aspects of plant physiology and life history, and may be an important new way of increasing human crop yields.

## Results

### Hydroponic Seed and Seedling Trials

Both root systems and seeds of *Phaseolus vulgaris* (Bean), *Pisum sativum* (Pea), *USU-Apogee* (Space Wheat), and *Zea mays L.* (Corn) were exposed to variable concentrations of H<sub>2</sub>S dissolved in deionized water. Concentrations of H<sub>2</sub>S varying from 10–100 μM caused absolute stem and leaf growth (both length and mass) in seedlings to be significantly larger (F = 10.86, df 96, P < 0.001) for all treated plants than controls of the same species (Figure 1). Maximum growth rates for beans was highest at 10 μM, with an average length of 18.78 ± 1.49 cm, which was significantly higher than controls at 8.8 ± 1.26 cm (T = 3.8062, df 49, P < 0.001). Additionally, maximum wet mass, with an average of 0.951 ± 0.16 g (T = 5.46, P < 0.001; F = 9.58, df 96, P < 0.001), was observed in 10 μM treatment. The 5 μM treatment was similar to the 10 μM treatment at 15.24 ± 1.27 cm and 0.928 ± 0.10 g, but was still significantly larger than the controls (F = 10.49, df 96, P < 0.001). For peas, maximum length change (11.3 ± 0.66 cm) occurred at 100 μM (Figure 1) and was the only treatment that was statistically different (T = 3.4035 P < 0.01 &

$F = 3.59$ ,  $df = 1$ ,  $P < 0.01$ ) from the controls ( $6.72 \pm 0.8$  cm). However, maximum change in wet mass occurred at  $5 \mu\text{M}$  with an observed value  $0.223 \pm 0.04$  g, which was statistically different from controls  $0.04 \pm 0.05$  g ( $F = 4.494$ ,  $df = 96$ ,  $P < 0.01$ ). Plants treated with higher than  $1 \text{ mM}$  experienced decreased growth rate, with mortality at  $>20 \text{ mM}$ .

In addition to increasing growth rates at a finite and relatively narrow concentration of H<sub>2</sub>S, we found that time to germination in seeds treated with H<sub>2</sub>S was significantly less than values observed in untreated seeds (controls) (Figure 2). Seedlings of treated seeds also showed a significantly greater length compared to controls after seven days (Table 1).

### Growth To Maturity In Soil

When space wheat plants were grown to maturity, it was observed that the overall length of the plants, when exposed to H<sub>2</sub>S, were slightly longer, however not statistically different than that of the controls ( $37.1 \pm 2.2$  cm for  $0 \mu\text{M}$  (controls), whereas  $1 \mu\text{M}$  was  $37.5 \pm 4.1$  cm,  $10 \mu\text{M}$  was  $38.4 \pm 3.6$  cm,  $100 \mu\text{M}$  was  $37.2 \pm 4.6$  cm, and  $500 \mu\text{M}$  was  $37.2 \pm 4.7$  cm). This difference between treatments is amplified when exposing the plants to H<sub>2</sub>S every seven days ( $36.6 \pm 2.1$  cm for  $0 \mu\text{M}$  (controls), whereas  $1 \mu\text{M}$  was  $38.6 \pm 5.2$  cm,  $10 \mu\text{M}$  was  $39.9 \pm 2.1$  cm,  $100 \mu\text{M}$  was  $40.3 \pm 3.6$  cm, and  $500 \mu\text{M}$  was  $40.2 \pm 1.8$  cm;  $P = 0.08$ ;  $F = 2.6$ ). The overall mass of the plant, roots and fruit were independently larger than the controls for all plants exposed to H<sub>2</sub>S. The mass of the entire plant was  $7.0 \pm 0.3$  g for  $0 \mu\text{M}$  (controls), whereas  $1 \mu\text{M}$  was  $8.3 \pm 0.6$  g,  $10 \mu\text{M}$  was  $9.9 \pm 0.5$  g,  $100 \mu\text{M}$  was  $8.8 \pm 0.7$  g, and  $500 \mu\text{M}$  was  $10.8 \pm 0.8$  g, and each was statistically different from the controls ( $df = 84$ ,  $F = 4.81$ ;  $P < 0.01$ ). Likewise, the mass of the roots was larger in treated plants ( $1 \mu\text{M}$  was  $3.8 \pm 1.6$  g,  $10 \mu\text{M}$  was  $4.5 \pm 0.8$  g,  $100 \mu\text{M}$  was  $4.7 \pm 1.0$  g, and  $500 \mu\text{M}$  was  $4.7 \pm 0.4$  g) compared to that of the controls ( $2.8 \pm 0.6$  g for  $0 \mu\text{M}$ ). Beyond the macro plant, the produced fruit was larger in the treated plants:  $0.95 \pm 0.1$  g for  $0 \mu\text{M}$  (controls), whereas  $1 \mu\text{M}$  was  $1.1 \pm 0.0$  g,  $10 \mu\text{M}$  was  $1.1 \pm 0.1$  g,  $100 \mu\text{M}$  was  $1.1 \pm 0.1$  g, and  $500 \mu\text{M}$  was  $1.5 \pm 0.2$  g (Figure 3).

### Leaf Disk Trials

Leaf disks exposed to H<sub>2</sub>S also experienced increased growth relative to controls. ( $F = 5.16$ ,  $df = 63$ ,  $P < 0.01$ ). Mean change in

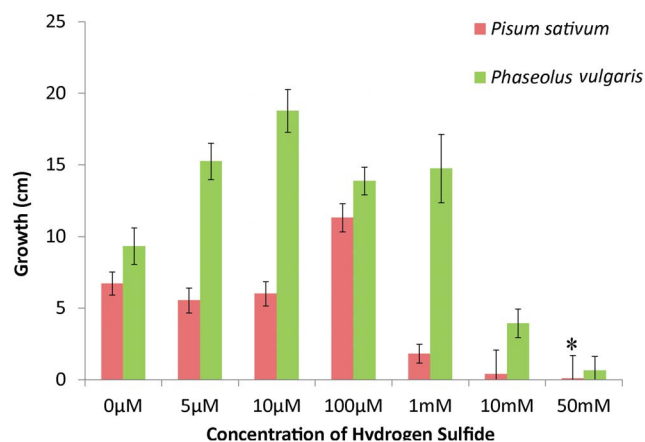

**Figure 1. In both *Pisum sativum* (pea plants) and *Phaseolus vulgaris* (bean plants), increased growth as measured linear growth (stems plus roots) is observed with all levels of H<sub>2</sub>S exposures. \* signifies a data point as being  $\leq 0$ . SD bars shown. doi:10.1371/journal.pone.0062048.g001**

growth was  $0.17 \pm 0.02$  mm for controls;  $1 \mu\text{M}$ :  $0.36 \pm 0.01$  mm;  $10 \mu\text{M}$ :  $0.26 \pm 0.03$  mm; and  $100 \mu\text{M}$ :  $0.32 \pm 0.01$  mm. Finally, when we compared the cells from the leaf disks it was determined that the cell size (diameter and area) was significantly smaller ( $\sim 13\%$  and  $18\%$ ) than those of the controls ( $F = 66.7$ ,  $df = 1590$ ,  $P < 0.001$ ). Mean diameter of controls was  $8.38 \pm 0.07 \mu\text{m}$ ;  $1 \mu\text{M}$ :  $7.4 \pm 0.09 \mu\text{m}$ ;  $10 \mu\text{M}$ :  $7.1 \pm 0.06 \mu\text{m}$ ; and  $100 \mu\text{M}$ :  $7.3 \pm 0.05 \mu\text{m}$ .

### Photosynthetic Activity

Throughout the experiments, photosynthetic activity ( $Q_{\text{max}}$  - a measurement of maximum photosynthetic output) of all plants was monitored using a Fluorcam.  $Q_{\text{max}}$  values maintained relatively comparable levels ( $0.6$ – $0.7$  for all treatments) to untreated controls until the  $50 \text{ mM}$  concentration, where significant decrease ( $< 0.1$ ) was observed and differences in reflected spectra were apparent [e.g. 29]. Additionally, high ( $< 10 \text{ mM}$ ) but sub-lethal levels caused photosystem (PS) II to shut down, whereas PS I remained active through the experimental period through and up to plant senescence [29].

### Discussion

In recent years, numerous experiments have shown that hydrogen sulfide causes an array of biological effects [13,33–38] and in this study we add to that growing list. Our experiments show that the application of extremely narrow concentrations (at taxon specific levels) of liquid H<sub>2</sub>S produces two separate kinds of increased growth rates in plants: time to seed germination; absolute mass of tissue in roots, stems, and leaves. Unlike the results in a previous study [33], our applications had no adverse effects on any of the treated plants: for example we observed no lesions or tumors during the duration of the studies reported here. Enhanced growth continued for up to seven days after a single exposure to H<sub>2</sub>S, followed by a return to the slower growth rates observed in controls, unless re-exposed. This study also shows that H<sub>2</sub>S is the *only* chemical necessary to produce such large differences in growth rates in these species.

Regardless of the physical, “macro-” changes in the plant, it is clear that the causes of these results are occurring on a cellular level. Our observation that cells increase in number rather than size suggests that the H<sub>2</sub>S molecules are provoking cellular division through some signaling process. The increased photosynthetic activity shown in a previous study [29] is either caused by increasing the photo-efficiency in the existing chloroplasts, or by increasing the absolute number of chloroplasts per area [25].

Because hydrogen sulfide has ‘clandestine messenger’ like properties [13], this combination of multiple cellular effects (changes in photosynthetic activity and cellular growth rate) from the plant’s contact with the relatively few number of H<sub>2</sub>S molecules affecting the plants treated in this study is reasonable. We hypothesize that administered H<sub>2</sub>S could be regulating a hormonal pathway [11,26] or actively effecting a transcription factor involved in cellular replication [39], and not just increasing growth rate as a byproduct of the addition of sulfur as a nutrient (“fertilizer”), as is seen through addition of large concentrations of phosphates or nitrates. In any event, it is clear that H<sub>2</sub>S is affecting the basic biology of the plants.

The origin of these effects is open to speculation. However, it may be that an increase in growth rates of some plants at the early onset of an increasing atmospheric or aqueous H<sub>2</sub>S load was an evolutionary response to short-term and catastrophic changes in global atmosphere during Phanerozoic mass extinction events, when a combination of higher temperature, oceanic anoxia, and release of gaseous hydrogen sulfide into the atmosphere contrib-

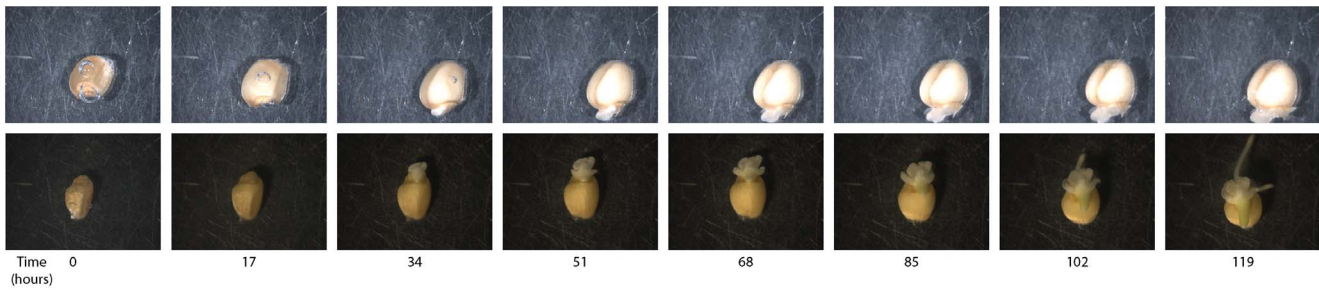

**Figure 2.** This image shows the germination of a *USU-Apogee* (Space Wheat) seed taken over 119 hrs at 16 hr intervals. The top panel shows the control seed germination while the bottom displays the H<sub>2</sub>S exposed seed. Note at 119 hrs the control is less developed than the exposed. doi:10.1371/journal.pone.0062048.g002

uted to various global mass extinctions [1–3]. Previous work on H<sub>2</sub>S toxicity (e.g. [29], and unpublished observations made during the research described here) has shown that toxicity (as recognized by LD<sub>50</sub> curves) decreases with plant size, even in the same species. The mechanism observed here might be that simple: at the first recognition of oncoming H<sub>2</sub>S concentrations, survivability would be affected by overall plant size. Rapid growth would be selected for. While these results are early in development, these findings may provide beneficial use to agriculture and biofuels.

**Materials and Methods**

**Hydrogen Sulfide Preparation**

Half-molar hydrogen sulfide was made by dissolving 78.04 grams of anhydrous sodium sulfide into 500 mL of double filtered di-water. Hydrochloric acid was then titrated into this solution in 0.01 mL increments while stirring until pH of 7.2 was reached,

resulting in a solution 0.5 M ± 25 mM (5%) as determined by using H<sub>2</sub>S/Sulfide Probe (Sea & Sun Technology GmbH, Trappenkamp, Germany). The 0.5 M H<sub>2</sub>S solution was then filtered and stored in a 500 mL flask filled with nitrogen gas to maintain stability.

Each treatment concentration was made adding ddi-H<sub>2</sub>O. After dilution the H<sub>2</sub>S/Sulfide Probe was used to confirm concentration.

**Hydroponic Seed and Seedling Trials**

Seeds from four common crop species *Phaseolus vulgaris* (Bean), *Pisum sativum* (Pea), *USU-Apogee* (Space Wheat), and *Zea mays L.* (Corn) were exposed to five levels (0 μM, 10 μM, 100 μM, 500 μM and 1 mM, ± 5 μM error) of liquid hydrogen sulfide dissolved in ddi-H<sub>2</sub>O. Germination rates as well as the quantity of growth was measured and compared to a control (0 μM H<sub>2</sub>S), for a seven day growth period. Thirty seeds, of each species were placed into 100 ml petri-dishes filled with 50 ml of solution. Due to the relatively short half-life of H<sub>2</sub>S when in solution [40], treatment liquids were replaced daily. Petri-dishes containing seeds were randomly placed on a shelf serviced by 12 hours of ~100 μmol m<sup>-2</sup>s<sup>-1</sup> of light daily. Temperature was ambient room temperature (~23°C). Every day at the same hour, the number of seeds which germinated was recorded. At 72 and 168 hours, the length of the fresh seedling was recorded using digital calipers

Seedlings of the same species of pea and bean used in the germination trials were also germinated hydroponically in 250 mL containers (seeds in this case untreated with H<sub>2</sub>S) Seeds were wrapped with a clean paper-towel and mounted to a glass slide.

**Table 1.** Percent Germination over time by concentration of H<sub>2</sub>S.

| Zea mays L. (corn)        |        |         |          |          |       |
|---------------------------|--------|---------|----------|----------|-------|
| Time (Hours)              | 0( μM) | 10( μM) | 100( μM) | 500( μM) | 1(mM) |
| 24                        | 0      | 0       | 0        | 0        | 0     |
| 48                        | 3.3    | 10      | 26.6     | 5        | 0     |
| 72                        | 23.3   | 40      | 46.6     | 45       | 40    |
| 168                       | 90     | 90      | 93       | 60       | 75    |
| USU-apogee (wheat)        |        |         |          |          |       |
| 24                        | 80     | 95      | 90       | 55       | 60    |
| 48                        | 90     | 100     | 95       | 85       | 65    |
| 72                        | 95     | 100     | 95       | 95       | 100   |
| 168                       | 95     | 100     | 95       | 100      | 100   |
| Pisum sativum (pea)       |        |         |          |          |       |
| 24                        | 0      | 6.6     | 10       | 5        | 5     |
| 48                        | 50     | 73.3    | 63.3     | 30       | 25    |
| 72                        | 73.3   | 90      | 76.6     | 85       | 65    |
| 168                       | 80     | 96.6    | 90       | 85       | 65    |
| Phaseolus vulgaris (bean) |        |         |          |          |       |
| 24                        | 3.3    | 6.6     | 10       | 10       | 5     |
| 48                        | 3.3    | 10      | 13       | 15       | 15    |
| 72                        | 16.6   | 26.6    | 30       | 75       | 55    |
| 168                       | 93.3   | 90      | 100      | 100      | 95    |

doi:10.1371/journal.pone.0062048.t001

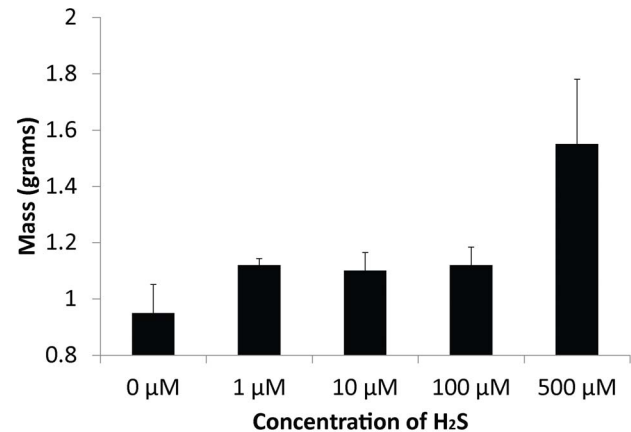

**Figure 3.** Average fruit yield per wheat plant. SD bars shown. doi:10.1371/journal.pone.0062048.g003

The slide, containing a seed, was placed into the container and immersed in 75 ml of ddi-H<sub>2</sub>O. The containers were randomly placed on shelves serviced by grow lights which provided 12 hours of  $\sim 100 \mu\text{mol m}^{-2}\text{s}^{-1}$  of light daily. Water was replenished weekly. Temperature was ambient room temperature ( $\sim 23^\circ\text{C}$ ).

Upon germination, seedlings were grown for fourteen days and then randomly selected for treatments. Twenty-Five seedlings were selected for each treatment and a control (0  $\mu\text{M}$ , 5  $\mu\text{M}$ , 10  $\mu\text{M}$ , 100  $\mu\text{M}$ , 1 mM, 10 mM and 50 mM). Before exposure, and 24, 48 & 168 hours, photosynthetic output ( $Q_{\text{max}}$  of the formula  $F_v/F_m$ ) was measured with a Z100 Kinetic Multispectral Fluorescence Imaging FluorCam System by P.S.I.  $Q_{\text{max}}$ , the maximal photochemical efficiency of PSII ( $F_v/F_m$ ) was calculated according to Krause and Weis [41] equation:  $\frac{F_v}{F_m} = \frac{F_m - F_o}{F_m}$ . At the same time, length measurements of both the shoot and root, and wet mass of each plant were taken and recorded. A liquid H<sub>2</sub>S solution of 5  $\mu\text{M}$ , 10  $\mu\text{M}$ , 100  $\mu\text{M}$ , 1 mM, 10 mM, and 50 mM was then applied to the root each day. All plants were raised under similar environmental conditions  $\sim 100 \mu\text{mol m}^{-2}\text{s}^{-1}$  of light daily, ambient room temperature ( $\sim 23^\circ\text{C}$ ) and relative humidity. In addition, we measured the pH of each treatment in order to rule out pH change as the reasoning for growth differences.

### Growth To Maturity In Soil

One seed, of *USU-Apogee*, was placed in each of the four corners of a half-gallon pot filled with 400 grams of sunshine #6 soil. Each seed was submersed one cm from the surface of the soil. Six pots, each containing four seeds, were placed into each treatment. Treatments consisted of 0, 1, 10, 100 and 500  $\mu\text{M}$  H<sub>2</sub>S solutions (diluted with ddi-H<sub>2</sub>O). Additionally, each treatment consisted of two sub treatments; a three day and weekly exposure regimen.

Seeded pots were watered, either weekly or every three days, with 300 milliliters of the corresponding treatment solutions (0, 1, 10, 100 and 500  $\mu\text{M}$ ). Seeded pots were haphazardly distributed in the University of Washington Botany Greenhouse. Each week the length of the shoot, number of leaves, and developmental level was measured. At the conclusion of nine weeks all plants were mature and had produced fruit. Each plant was carefully removed from the soil with root mass intact, and gently washed to remove the dirt. Whole plants were patted dry with a paper towel and weighed to the nearest 0.1grams. The roots and the fruit were independently removed from the plant and weighed to the nearest 0.1grams. Finally, the length of the plant was measured (to the nearest 0.5 cm).

### Leaf Disks

Sixty-four,  $6.05 \pm 0.03$  millimeter diameter, leaf disks were cut from growing leaves on a bean plant, which was grown in UW Botany Greenhouse. Disks were floated in a deionized water bath. Individual disks were haphazardly selected from this water bath, measured with digital calipers and put into labeled petri-dishes.

### References

- Erwin DH (1993) The Great Paleozoic Crisis: Life and Death in the Permian Columbia. New York, Univ. Press.
- Kump LR, Pavlov A, Arthur MA (2005) Massive release of hydrogen sulfide to the surface ocean and atmosphere during intervals of oceanic anoxia. *Geology* 33: 397–400.
- Ward PD (2006) Impact from the Deep. *Sci Am* 295.4: 64–71.
- Ward PD (2007) Under a Green Sky: Global Warming, the Mass Extinctions of the Past, and What They Can Tell Us About Our Future. Smithsonian Books/Collins. New York.
- Kimura H (2002) Hydrogen sulfide as a neuromodulator. *Mol Neurobiol* 26: 13–19.
- Zhao W, Wang R (2002) H<sub>2</sub>S-induced vasorelaxation and underlying cellular and molecular mechanisms. *Am J Physiol Heart Circ Physiol* 283: H474–H480.
- Wang R (2003) The gasotransmitter role of hydrogen sulfide. *Antioxid Redox Sign* 5: 493–501.
- Nagai Y, Tsugane M, Oka J, Kimura H (2004) Hydrogen sulfide induces calcium waves in astrocytes. *FASEB J* 18: 557–559.
- Searcy DG, Peterson MA (2004) Hydrogen sulfide consumption measured at low steady state concentrations using a sulfidostat. *Anal Biochem* 324: 269–275.
- Doeller JE, Isbell TS, Benavides G, Koenitzer J, Patel H, et al. (2005) Polarographic measurement of hydrogen sulfide production and consumption by mammalian tissues. *Anal Biochem* 341: 40–51.

Numbers associated with the labeled petri-dishes were randomly selected using a number generator and sixteen individual leaf disks were placed into treatments (0, 1, 10 and 100  $\mu\text{M}$  of H<sub>2</sub>S + ddi-H<sub>2</sub>O soln.) by a second individual. The first person, who took measurements, was unaware of which disks were in what treatment throughout the experiment. Initial disk size per treatment was statistically compared using ANOVA, to determine if the sample was truly random. Twenty-four and forty-eight hours after exposure, leaf disks which were determined to be random were re-measured, using digital calipers, and the growth rate was compared.

Images (taken from Leica dissection scope camera) from an additional replicate of 10 disks per treatment, using the same double blind methods, were analyzed with Mitotic Image Plus 2.0 (Motic China Group Co.). Measurements consisted of: precision diameter (the largest distance across the leaf using two points); 3-point circle (3 points selected at random to form a circle of best fit); 5-point circle (5 points selected at random to form a circle of best fit); area in field of view using background exclusion. Measurements were compared to that of the calipers and differences were compared by using theoretical calculations: i.e. a theoretical area was calculated using the diameter ( $\pi R^2$ ;  $R = \frac{D}{2}$ ) as determined by the calipers and compared to that of the measurements obtained above.

Individual cell size was measured using tissues obtained from the leaf disk experiments. Cell size was measured using a 40 $\times$  lens on compound microscope with camera attached. Images obtained from the microscope were analyzed using Motic Images Plus 2.0. Diameter and area of all cells, in the field of view, were measured; a total of 1590 cells.

### Statistical Test

Means from each treatment group were compared against the control by a paired T-test. Secondly, these data was inputted into R (R version 2.14.2) and treatments were compared as factors using a linear regression model with ANOVA. Both T and F statistics are listed when appropriate.

### Acknowledgments

We would like to thank R. Vets, R. Jappert, K. Rarich, C. Williams, T. Tobin, as well as the Department of Biology and the University of Washington. Additionally, we would like to thank Dr. S. Hunt of Qubit Systems for advice on the use of equipment used in these experiments and USU Crop Physiology Laboratory for providing *USU-Apogee* (Space Wheat).

### Author Contributions

Conceived and designed the experiments: FDD PDW. Performed the experiments: FDD SPN. Analyzed the data: FDD PDW. Contributed reagents/materials/analysis tools: PDW. Wrote the paper: FDD SPN PDW.

11. Hancock JT, Lisjak M, Teklic T, Wilson ID, Whiteman M (2011) Hydrogen sulfide and signaling in plants. CAB Reviews: Perspectives in agriculture, veterinary science. Nutrition and Natural Resources 6: 1–7.
12. Garcia-Mata C, Lamatina L (2010) Hydrogen sulfide, a novel gasotransmitter involved in guard cell signalling. New Phytol 188: 977–84.
13. Lloyd D, Murray DB (2006) The temporal architecture of eukaryotic growth. FEBS Lett 580: 2830–2835.
14. Mancardi D, Penna C, Merlino A, Del SP, Wink DA, et al. (2009) Physiological and pharmacological features of the novel gasotransmitter: hydrogen sulfide. Biochim Biophys Acta 1787: 864–72.
15. Roth MB, Nystul T (2005) Buying Time in Suspended Animation. Sci Am 292.6: 48–55.
16. Lloyd D, Kristensen B, Degn H (1981) Oxidative detoxification of hydrogen sulfide detected by mass spectrometry in the soil amoeba *Acanthamoeba castellanii*. J Gen Microbiol 126: 167–170.
17. Powell MA, Somero GN (1986) Hydrogen sulfide oxidation is coupled to oxidative phosphorylation in mitochondria of *Solemya reidi*. Sci 233: 563–565.
18. Yong R, Searcy DG (2001) Sulphide oxidation coupled to ATP synthesis in chicken liver mitochondria. Comp Biochem Physiol B Biochem Mol Biol 129: 129–137.
19. Miroshnichenko ML, Bonch-Osmolovskaya EA (2006) Recent developments in the thermophilic microbiology of deep-sea hydrothermal vents. Extremophiles 10: 85–96.
20. Aon MA, Cortassa S, Akar FG, O'Rourke B (2006) Mitochondrial criticality: a new concept at the turning point of life or death. Biochim Biophys Acta 1762: 232–240.
21. Jarvis B (1995) Factors affecting the development of cider flavour. J Appl Bact Symp 79: 5–18.
22. Lloyd D, Murray DB (2005) Ultradian metronome: timekeeper for orchestration of cellular coherence. Trends Biochem Sci 30: 373–377.
23. Miller DL, Roth MB (2007) Hydrogen sulfide increases thermotolerance and lifespan in *Caenorhabditis elegans*. PNAS 104: 20618–20622.
24. Lloyd D (2006) Hydrogen sulfide: clandestine microbial messenger? Trends Microbiol 14: 456–462.
25. Chen J, Wu FH, Wang WH, Zheng CJ, Lin GH, et al. (2011) Hydrogen sulphide enhances photosynthesis through promoting chloroplast biogenesis, photosynthetic enzyme expression, and thiol redox modification in *Spinacia oleracea* seedlings. J Exp Bot 62: 4481–4493.
26. Lisjak M, Teklic T, Wilson ID, Wood M, Whiteman M, et al. (2011) Hydrogen sulfide effects on stomatal apertures. Plant Signal Behav 6 (10): 1444–1446.
27. Oren A, Padan E, Malkin S (1979) Sulfide inhibition of photosystem II in cyanobacteria (blue-green algae) and tobacco chloroplast. Biochim Biophys Acta 546: 270–279.
28. Cohen Y, Jorgensen BB, Revsbech NP (1986) Adaptation to Hydrogen Sulfide of Oxygenic and Anoxygenic Photosynthesis Among Cyanobacteria. Appl Environ Microb 51: 398–407.
29. Dooley F, Wylie-Echeverria S, Roth MB, Ward PD (2013) Tolerance and response of *Zostera marina* seedlings to hydrogen sulfide. Aquat Bot 105: 7–10.
30. Zhang H, Hu LY, Hu KD, He YD, Wang SH, et al. (2008) Hydrogen sulfide promotes wheat seed germination and alleviates oxidative damage against copper stress. J Integr Plant Biol 50: 1518–1529.
31. Zhang H, Tan ZQ, Hu LY, Wang SH, Luo JP, et al. (2010) Hydrogen sulfide alleviates aluminum toxicity in germinating wheat seedlings. J Integr Plant Biol 52: 556–567.
32. Wang Y, Li K, Cui W, Xu S, Shen W, et al. (2012) Hydrogen sulfide enhances alfalfa (*Medicago sativa*) tolerance against salinity during seed germination by nitric oxide pathway. Plant Soil 351: 107–119.
33. Thompson CR, Kats G (1978) Effects of continuous hydrogen sulfide fumigation on crop and forest plants. Environ Sci Technol 12: 550–553.
34. Fenchel T, Finlay B (1995) Ecology and Evolution in Anoxic Worlds. Oxford University Press.
35. Raven JA, Scrimgeour CM (1995) The influence of anoxia on plants of saline habitats with special reference to the sulphur cycle. Ann Bot 79: 79–86.
36. Attene-Ramos MS, Wagner ED, Plewa MJ, Gaskins HR (2006) Evidence that hydrogen sulfide is a genotoxic agent. Mol Cancer Res 4: 9–14.
37. Mascaro O, Valdemarsen T, Holmer M, Perez M, Romero J (2009) Experimental manipulation of sediment organic content and water column aeration reduces *Zostera marina* (eelgrass) growth and survival. J Exp Mar Biol Ecol 373: 26–34.
38. Li L, Whiteman M, Guan YY, Neo KL, Cheng Y, et al. (2008) Characterization of a novel, water-soluble hydrogen sulfide releasing molecule (GYY4137): New insights into the biology of hydrogen sulphide. Circulation 117: 2351–60.
39. Volkel S, Grieshaber MK (1997) Sulphide oxidation and oxidative phosphorylation in the mitochondria of the lugworm *Arenicola*. J Exp Biol 200: 83–92.
40. Napoli AM, Mason-Plunkett J, Valente J, Sucov A (2006) Full Recovery of Two Simultaneous Cases of Hydrogen Sulfide Toxicity. Hosp Phys 42: 47–50.
41. Krause GH, Weis E (1991) Chlorophyll fluorescence and photosynthesis: the basics. Ann Rev Plant Phys 42: 313–349.
